# Supplementary material for: Low temperature synthesis of silicon quantum dots with plasma chemistry control in dual frequency non-thermal plasmas
Source: Royal Society of Chemistry journal article supplement (doi:10.1039/c6cp01856d), 2016-01-01

## Supplementary information

### Importance of RF/UHF dual frequency PECVD

Our earlier experience shows that RF/UHF dual frequency sources can produce significantly high plasma density even at low power. If we apply equal power by RF and UHF sources the plasma density is much smaller than that of their combined effect. Plasma density is also radially uniform, which favors the deposition of uniform film thickness up to larger area.

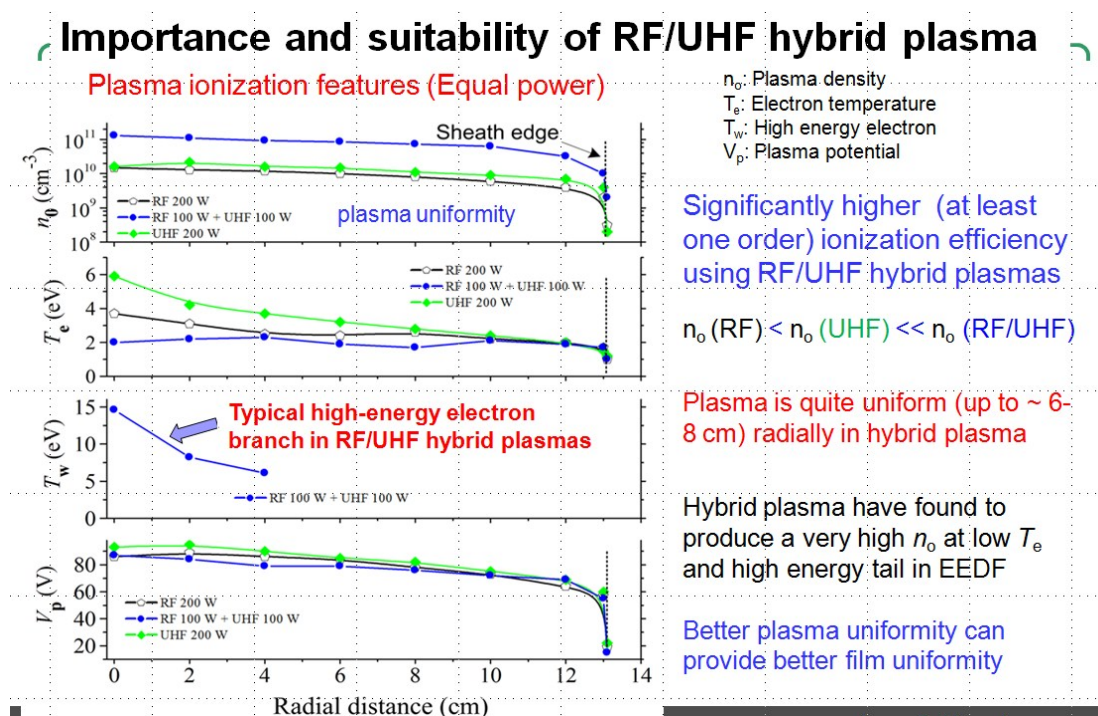

## QD process optimization by combining RF and UHF power

### Raman data for Process optimization

## Process optimization by plasma control

### Raman analysis

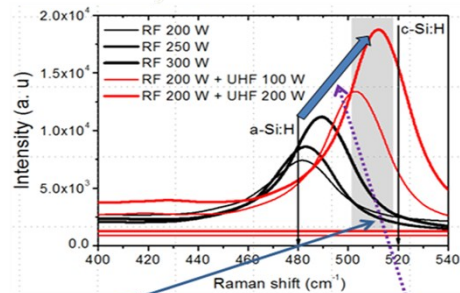

30 mTorr pressure  
 $N_2/NH_3/SiH_4$  process

### Shaded region

represents QD feature  
(one needs nano Si dots or crystalline like film)

amorphous -crystalline Si transition occurs with the addition of UHF power with RF power

### SEM data

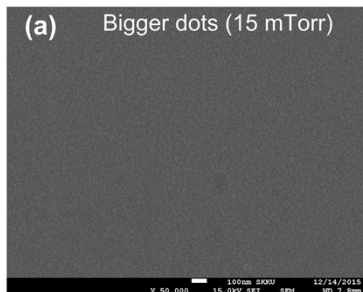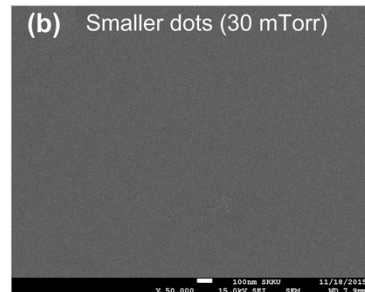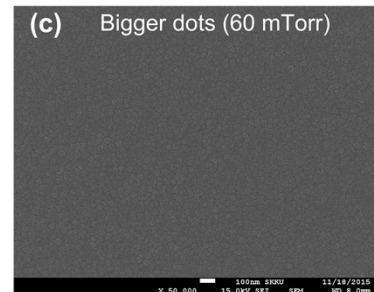

### XPS data:

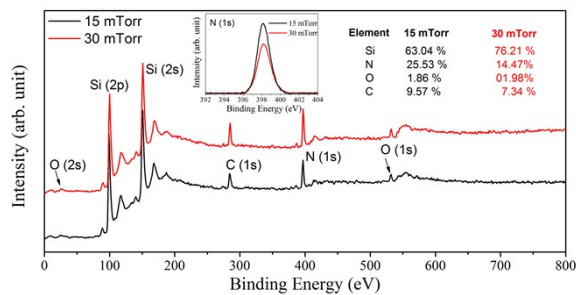

Supplement: c6cp01856d1.pdf [file c6cp01856d1.pdf]
